# Supplementary material for: Can the Combined Use of the Mirid Predator Nesidiocoris tenuis and a Braconid Larval Endoparasitoid Dolichogenidea gelechiidivoris Improve the Biological Control of Tuta absoluta?
Source: MDPI journal article supplement (doi:10.3390/insects12111004), 2021-11-08
Supplement: s1 [file s1]

**Table S1** Counties of Kenya where *Tuta absoluta* was collected to maintain the genomic pool of the established laboratory colony

| <b>County</b> | <b>GPS coordinates</b>              | <b>Number of sites sampled</b> |
|---------------|-------------------------------------|--------------------------------|
| Kajiado       | 1° 50' 30.984" S 36° 47' 21.3648" E | 14                             |
| Kwale         | 4° 10' 31.116" S 39° 27' 11.952" E  | 7                              |
| Limuru        | 1° 6' 33.66" S 36° 38' 35.592" E    | 11                             |
| Machakos      | 1° 31' 6.348" S 37° 16' 0.8364" E   | 13                             |
| Meru          | 0° 2' 47.004" N 37° 39' 9.8928" E   | 8                              |
| Nakuru        | 0° 16' 53.364" S 36° 4' 42.3084" E  | 15                             |
| Nyeri         | 0° 25' 16.14" S 36° 56' 57.8724" E  | 2                              |
| Siaya         | 0° 3' 44.568" N 34° 17' 20.616" E   | 1                              |
| Taita Taveta  | 3° 23' 31.92" S 37° 40' 26.832" E   | 12                             |
| Mwea          | 1° 41' 47.04" S 37° 25' 2.712" E    | 5                              |
